# Supplementary material for: Propelling and perturbing appendages together facilitate strenuous ground self-righting
Source: eLife. 2021 Jul 7;10:e60233. doi: 10.7554/eLife.60233 (PMC8315797; doi:10.7554/eLife.60233)
Supplement: Figure 4—source data 1. [file elife-60233-fig4-data1.xlsx]

## Sheet: Sheet1
Dependent variable	Independent variable	θwing (°)	Statistical test	Test statistic	P
Pitch kinetic energy	θleg	60	ANOVA	F(1,18) = 6.13	0.023
		72		F(1,18) = 0.31	0.585
		83		F(1,18) = 0.09	0.771
Roll kinetic energy		60	ANOVA	F(1,18) = 225.92	<0.0001
		72		F(1,18) = 110.16	<0.0001
		83		F(1,18) = 36.15	<0.0001
Attempt success probability		60	Nominal logistic regression	χ2(1, n = 58) = 34.99	<0.0001
		72		χ2(1, n = 42) = 42.38	<0.0001
		83		χ2(1, n = 34) = 29.12	<0.0001
Number of attempts required		60	ANOVA	F(1,10) = 8.62	0.015
		72		F(1,13) = 3.90	0.069
		83		F(1,15) = 13.66	0.002
