# Supplementary material for: Propelling and perturbing appendages together facilitate strenuous ground self-righting
Source: eLife. 2021 Jul 7;10:e60233. doi: 10.7554/eLife.60233 (PMC8315797; doi:10.7554/eLife.60233)
Supplement: Figure 7—source data 1. — n = 134 attempts. [file elife-60233-fig7-data1.xlsx]

## Sheet: Sheet1
Dependent variable	Independent variable		Statistical test	Test statistic	P value
Maximal roll kinetic energy – roll potential energy barrier (Figure 7—figure supplement 2)	θleg	θwing = 60°	ANOVA	F1, 56 = 331.94	<0.0001
		θwing = 72°		F1, 40 = 274.73	<0.0001
		θwing = 83°		F1, 32 = 22.01	<0.0001
	θwing	θleg = 0°		F1, 64 = 188.51	<0.0001
		θleg = 15°		F1, 33 = 175.48	<0.0001
		θleg = 30°		F1, 16 = 318.48	<0.0001
		θleg = 45°		F1, 13 = 102.15	<0.0001
	Attempt’s result		ANOVA	F1, 132 = 10.33	0.0016
Maximal pitch kinetic energy – pitch potential energy barrier (Figure 7—figure supplement 3)	θleg	θwing = 60°	ANOVA	F1, 56 = 0.02	0.9
		θwing = 72°		F1, 40 = 13.62	0.0007
		θwing = 83°		F1, 32 = 3.21	0.083
	θwing	θleg = 0°		F1, 64 = 1711.73	<0.0001
		θleg = 15°		F1, 33 = 114.15	<0.0001
		θleg = 30°		F1, 16 = 417.62	<0.0001
		θleg = 45°		F1, 13 = 201.21	<0.0001
	Attempt’s result		ANOVA	F1, 132 = 41.84	<0.0001
